# Supplementary material
Source: PubMed Central journal article supplement (PMC6583840)
Supplement: jamasurg-154-610-s002.pdf [file jamasurg-154-610-s002.pdf]

## **Data Sharing Statement**

**Data**

**Data available:** No
